# Supplementary material for: An Update on Resurgence of Diphtheria Cases in West Africa: Investigating Factors Behind Outbreaks Despite Annual WHO Vaccination Initiatives
Source: Preprints.org preprint supplement (doi:10.20944/preprints202408.0814.v1), 2024-08-12
Supplement: Supplementary file 1 [file supplementary]

## Sheet: Sheet1
Country / Region	Antigen	Category	2022	2021	2020	2019
Burkina Faso	DTP-containing vaccine, 1st dose	WUENIC	95%	95%	95%	95%
Burkina Faso	DTP-containing vaccine, 3rd dose	WUENIC	91%	91%	91%	91%
Côte d'Ivoire	DTP-containing vaccine, 1st dose	WUENIC	85%	85%	84%	92%
Côte d'Ivoire	DTP-containing vaccine, 3rd dose	WUENIC	76%	76%	75%	81%
Gambia	DTP-containing vaccine, 1st dose	WUENIC	85%	82%	88%	93%
Gambia	DTP-containing vaccine, 3rd dose	WUENIC	79%	82%	85%	88%
Ghana	DTP-containing vaccine, 1st dose	WUENIC	99%	99%	94%	97%
Ghana	DTP-containing vaccine, 3rd dose	WUENIC	99%	98%	94%	97%
Guinea	DTP-containing vaccine, 1st dose	WUENIC	62%	62%	62%	62%
Guinea	DTP-containing vaccine, 3rd dose	WUENIC	47%	47%	47%	47%
Guinea-Bissau	DTP-containing vaccine, 1st dose	WUENIC	81%	81%	87%	86%
Guinea-Bissau	DTP-containing vaccine, 3rd dose	WUENIC	74%	67%	74%	78%
Liberia	DTP-containing vaccine, 1st dose	WUENIC	93%	81%	82%	86%
Liberia	DTP-containing vaccine, 3rd dose	WUENIC	78%	66%	65%	70%
Mali	DTP-containing vaccine, 1st dose	WUENIC	82%	82%	75%	82%
Mali	DTP-containing vaccine, 3rd dose	WUENIC	77%	77%	70%	77%
Mauritania	DTP-containing vaccine, 1st dose	WUENIC	84%	75%	80%	88%
Mauritania	DTP-containing vaccine, 3rd dose	WUENIC	76%	68%	72%	80%
Niger	DTP-containing vaccine, 1st dose	WUENIC	96%	94%	93%	92%
Niger	DTP-containing vaccine, 3rd dose	WUENIC	84%	82%	81%	81%
Nigeria	DTP-containing vaccine, 1st dose	WUENIC	70%	70%	70%	72%
Nigeria	DTP-containing vaccine, 3rd dose	WUENIC	62%	62%	62%	66%
Senegal	DTP-containing vaccine, 1st dose	WUENIC	90%	87%	93%	97%
Senegal	DTP-containing vaccine, 3rd dose	WUENIC	88%	85%	91%	95%
Sierra Leone	DTP-containing vaccine, 1st dose	WUENIC	92%	94%	93%	95%
Sierra Leone	DTP-containing vaccine, 3rd dose	WUENIC	91%	92%	91%	95%
Togo	DTP-containing vaccine, 1st dose	WUENIC	88%	88%	87%	90%
Togo	DTP-containing vaccine, 3rd dose	WUENIC	82%	83%	82%	84%

## Sheet: Glossary
Advanced filter	DEVELOPMENT STATUS World Economic Situation and Prospects 2023: https://www.un.org/development/desa/dpad/publication/world-economic-situation-and-prospects-2023/ GAVI Eligibility: https://www.gavi.org/types-support/sustainability/eligibility UNICEF REGION: https://www.unicef.org/careers/where-we-work WORLD BANK INCOME STATUS: https://datahelpdesk.worldbank.org/knowledgebase/articles/906519-world-…

## Sheet: Meta data
Compare	While every reasonable effort has been made to make the information on the WHO Immunization Data portal as accurate as possible, WHO makes no claims, promises or guarantees about the effectiveness, completeness and accuracy of the contents of the WHO Immunization Data portal, and expressly disclaims any liability for damages as a result of the use and/or application of the WHO Immunization Data p…
Method of estimation of global and regional aggregates	For global and regional incidence, denominator includes only countries that reported data for each year. Global and regional coverage is a weighted sum of WHO/UNICEF estimates of national coverage by target population from the United Nations Population Division's World Population Prospects. The size of the target population is the national annual number of persons in the recommended target denomi…
Denominator	United Nations, Department of Economic and Social Affairs, Population Division (2022). World Population Prospects 2022, Online Edition.
Preferred data source	Reported cases: National surveillance systems Coverage: National immunization programme system, Household surveys, Administrative systems
Data collection source	WHO/UNICEF Joint Reporting Form on Immunization (JRF)
Data frequency	Reported cases and incidence: Data are collected annually through the WHO/UNICEF Joint Reporting Form on Immunization (JRF) exercise (occurring in the Q1-Q2 of each year). Country data (including historical data) are updated and made available as received. Global and regional aggregate data are released annually mid-July and updated thereafter as country data is received. Vaccination coverage: Ad…
Reported cases limitations	Reported data is subject to numerous limitations. Surveillance systems do not always follow WHO recommendations, underreporting of cases can occur, and many countries are unable to confirm cases by laboratory testing. Furthermore, changes made to a country's surveillance system can impact any time-series analysis.
Coverage limitations	Description of the denominator of the target group in the country reported may be incomplete or different than the denominator suggested in the reporting form. Weaknesses of the administrative system in the country may impact the coverage estimates.
Comments	Please inform WHO Global Monitoring team of incorrect or missing information at: vpdata@who.int.
